# Supplementary material for: Effective health promoting school for better health of children and adolescents: indicators for success
Source: PubMed Central journal article supplement (PMC6691553; doi:10.1186/s12889-019-7425-6), 2019-08-13
Supplement: 12889_2019_7425_MOESM2_ESM.pdf [file 12889_2019_7425_MOESM2_ESM.pdf]

*Appendix 2. Additional Basic Requirements for HPS identified by ANOVA*

| <b>Element</b>                                                                                                                                 | <b>Mean score of indicator in schools with</b> |                              |                              |                                      |
|------------------------------------------------------------------------------------------------------------------------------------------------|------------------------------------------------|------------------------------|------------------------------|--------------------------------------|
|                                                                                                                                                | <b>Gold Award<br/>n=16</b>                     | <b>Silver Award<br/>n=23</b> | <b>Bronze Award<br/>n=15</b> | <b>Baseline Assessment<br/>n=104</b> |
| <b><i>Healthy School Policies (PO)</i></b>                                                                                                     |                                                |                              |                              |                                      |
| 2.1 Healthy Eating                                                                                                                             | 0.87                                           | 0.80                         | 0.71                         | 0.52                                 |
| 2.2 Safe School                                                                                                                                | 0.82                                           | 0.75                         | 0.66                         | 0.51                                 |
| 2.3 Harmonious School                                                                                                                          | 0.89                                           | 0.85                         | 0.76                         | 0.59                                 |
| 2.4 Active School                                                                                                                              | 0.85                                           | 0.80                         | 0.69                         | 0.33                                 |
| <b><i>School's Physical Environment (PE)</i></b>                                                                                               |                                                |                              |                              |                                      |
| 1.1 School ensures students' safety whenever students are under their care                                                                     | 0.82                                           | 0.80                         | 0.76                         | 0.72                                 |
| 1.4 School has a system in place for the management of emergencies and natural disasters and ensure that all relevant personnel being informed | 0.83                                           | 0.81                         | 0.76                         | 0.71                                 |
| 1.5 School ensures fire safety                                                                                                                 | 0.88                                           | 0.83                         | 0.81                         | 0.79                                 |
| 1.7 School ensure a safe and healthy workplace for staff                                                                                       | 0.64                                           | 0.60                         | 0.59                         | 0.52                                 |

|                                                                                                                                                                                                             |      |      |      |      |
|-------------------------------------------------------------------------------------------------------------------------------------------------------------------------------------------------------------|------|------|------|------|
| <b><i>School's Social Environment (SE)</i></b>                                                                                                                                                              |      |      |      |      |
| 2.2 School has a system for the prevention, and management of unacceptable behaviour in school both among students and encourages staff to set personal examples for cultivating students' positive actions | 0.81 | 0.77 | 0.73 | 0.65 |
| <b><i>Action Competencies for Healthy Living (AC)</i></b>                                                                                                                                                   |      |      |      |      |
| 1.3 School tries to ensure all students have opportunities to actively engage with each topic, according to their age                                                                                       | 0.81 | 0.73 | 0.64 | 0.43 |
| 3.2 There are school staff who received professional training in health education or participated discussions on the development of HPS                                                                     | 0.75 | 0.38 | 0.31 | 0.24 |
| 3.3 School staff participate in different health education workshops or seminars, and have opportunities to collaborate with other teachers and exchange ideas to enhance the teaching of health            | 0.84 | 0.77 | 0.66 | 0.52 |
| 3.4 School provides diversified health education resources for staff, and such resources are well organised and managed                                                                                     | 0.89 | 0.83 | 0.79 | 0.68 |

|                                                                                                                                                                                                                                                                                                                   |      |      |      |      |
|-------------------------------------------------------------------------------------------------------------------------------------------------------------------------------------------------------------------------------------------------------------------------------------------------------------------|------|------|------|------|
| <b><i>Community Links (CL)</i></b>                                                                                                                                                                                                                                                                                |      |      |      |      |
| 2.2 School consults community members or groups that possess substantial understanding of the school for recommendations and/or professional advice on Healthy School development and involves them in assessing school's developmental needs and/or discussing arrangements for corresponding plans and projects | 0.87 | 0.71 | 0.63 | 0.45 |
| <b><i>School Health Care and Promotion Services (HS)</i></b>                                                                                                                                                                                                                                                      |      |      |      |      |
| 2.3 There was a provision of basic health care services and management                                                                                                                                                                                                                                            | 0.85 | 0.80 | 0.76 | 0.67 |

p-value < 0.05
