# Supplementary material for: Effective health promoting school for better health of children and adolescents: indicators for success
Source: PubMed Central journal article supplement (PMC6691553; doi:10.1186/s12889-019-7425-6), 2019-08-13
Supplement: 12889_2019_7425_MOESM3_ESM.pdf [file 12889_2019_7425_MOESM3_ESM.pdf]

**Appendix 3.** Pearson correlation coefficients between HKSHQ measures and core indicators (\*\* p-value <0.01, \* p-value<0.05)  
**(a) Action Competencies for Healthy Living (AC) and Health Related Outcomes**

| HKSHQ measures                                                                  | Primary schools |                 |               |                 |                |         |                | Secondary Schools |               |               |         |        |         |                |
|---------------------------------------------------------------------------------|-----------------|-----------------|---------------|-----------------|----------------|---------|----------------|-------------------|---------------|---------------|---------|--------|---------|----------------|
|                                                                                 | AC1.1           | AC1.3           | AC2.1         | AC3.2           | AC3.3          | AC3.4   | AC4.3          | AC1.1             | AC1.3         | AC2.1         | AC3.2   | AC3.3  | AC3.4   | AC4.3          |
| % of students think they are having good academic performance in past 12 months | 0.175           | 0.138           | 0.085         | 0.155           | 0.260*         | -0.043  | 0.023          | <b>0.367**</b>    | 0.064         | 0.121         | -0.015  | 0.206  | 0.112   | 0.193          |
| % of students think they are having good health status over past 30 days        | <b>0.314**</b>  | <b>0.349**</b>  | <b>0.234*</b> | <b>0.256*</b>   | <b>0.276**</b> | -0.003  | 0.118          | 0.108             | 0.016         | 0.003         | -0.083  | -0.122 | -0.063  | -0.064         |
| % of students that often obey traffic signals                                   | <b>0.258*</b>   | 0.034           | <b>0.229*</b> | 0.075           | 0.259*         | 0.003   | <b>0.248*</b>  | <b>0.400**</b>    | <b>0.269*</b> | <b>0.308*</b> | -0.027  | 0.260* | -0.062  | 0.112          |
| % of students that often put on seatbelts                                       | 0.166           | 0.004           | 0.126         | 0.171           | 0.230*         | 0.006   | 0.171          | <b>0.370**</b>    | 0.182         | <b>0.275*</b> | -0.038  | 0.182  | 0.042   | 0.239          |
| % of students having enough vegetable every day                                 | 0.152           | 0.186           | -0.011        | <b>0.236*</b>   | <b>0.253*</b>  | 0.036   | 0.001          | -0.055            | -0.164        | -0.242        | -0.272* | -0.174 | -0.052  | -0.163         |
| % of students having enough fruit every day                                     | <b>0.243*</b>   | <b>0.303**</b>  | 0.099         | <b>0.264*</b>   | <b>0.269*</b>  | 0.088   | 0.158          | 0.258             | 0.064         | 0.147         | -0.159  | 0.115  | 0.345** | 0.194          |
| % of students having crisps more than 4 times per week                          | -0.149          | <b>-0.348**</b> | -0.069        | -0.136          | -0.029         | -0.156  | -0.046         | <b>-0.267*</b>    | -0.158        | 0.058         | 0.208   | -0.047 | 0.029   | -0.010         |
| % of students having candies more than 4 times per week                         | <b>-0.266*</b>  | <b>-0.487**</b> | -0.177        | -0.167          | -0.179         | -0.250* | -0.075         | <b>-0.427**</b>   | -0.138        | -0.110        | -0.099  | -0.103 | -0.051  | <b>-0.333*</b> |
| % of students having soft drink more than 4 times per week                      | <b>-0.326**</b> | <b>-0.356**</b> | -0.192        | <b>-0.287**</b> | -0.166         | -0.062  | <b>-0.214*</b> | -0.193            | -0.083        | -0.158        | 0.091   | 0.010  | -0.019  | -0.058         |
| % of students having preserved meat more than 4 times per week                  | <b>-0.211*</b>  | <b>-0.291**</b> | -0.101        | <b>-0.295**</b> | -0.131         | -0.010  | -0.064         | <b>-0.395**</b>   | -0.189        | -0.137        | -0.054  | -0.038 | -0.064  | -0.129         |

| HKSHQ measures                                                                  | Primary schools |                 |                 |                 |                 |                 |                 | Secondary Schools |                 |                 |        |                |                |                 |
|---------------------------------------------------------------------------------|-----------------|-----------------|-----------------|-----------------|-----------------|-----------------|-----------------|-------------------|-----------------|-----------------|--------|----------------|----------------|-----------------|
|                                                                                 | AC1.1           | AC1.3           | AC2.1           | AC3.2           | AC3.3           | AC3.4           | AC4.3           | AC1.1             | AC1.3           | AC2.1           | AC3.2  | AC3.3          | AC3.4          | AC4.3           |
| % of students having enough physical activity                                   | <b>0.330**</b>  | <b>0.281**</b>  | 0.206           | <b>0.240*</b>   | <b>0.280**</b>  | 0.030           | <b>0.318**</b>  | 0.094             | -0.051          | -0.032          | -0.013 | -0.043         | -0.045         | -0.035          |
| % of students spend 2 hours or more on watching TV every day                    | <b>-0.255*</b>  | <b>-0.215*</b>  | <b>-0.303**</b> | -0.075          | <b>-0.237*</b>  | <b>-0.295**</b> | <b>-0.331**</b> | <b>-0.463**</b>   | -0.111          | -0.220          | -0.075 | -0.128         | -0.199         | <b>-0.415**</b> |
| % of students spend 2 hours or more on playing video games every day            | -0.028          | 0.072           | -0.095          | -0.179          | -0.117          | -0.189          | -0.205          | -0.249            | -0.070          | -0.170          | -0.003 | -0.185         | <b>-0.328*</b> | <b>-0.288*</b>  |
| Mean K6 score of students                                                       | <b>-0.323**</b> | <b>-0.359**</b> | -0.205          | <b>-0.362**</b> | <b>-0.277**</b> | 0.031           | <b>-0.246*</b>  | <b>-0.372**</b>   | <b>-0.363**</b> | <b>-0.307*</b>  | -0.174 | -0.036         | -0.211         | <b>-0.299*</b>  |
| % of students feeling so sad or hopeless that he/she will stop usual activities | -0.088          | -0.034          | -0.153          | -0.067          | -0.078          | 0.002           | <b>-0.239*</b>  | -0.085            | -0.082          | -0.098          | 0.228  | 0.037          | -0.028         | 0.018           |
| % of students smoke                                                             | -0.078          | 0.080           | -0.046          | <b>-0.248*</b>  | -0.070          | -0.007          | -0.057          | -0.115            | -0.142          | <b>-0.267*</b>  | 0.037  | -0.175         | 0.013          | -0.082          |
| % of students have sex                                                          | 0.110           | 0.056           | 0.186           | 0.000           | -0.021          | 0.102           | 0.022           | <b>-0.265*</b>    | -0.191          | <b>-0.310*</b>  | -0.086 | -0.260*        | 0.016          | -0.128          |
| % of students who are classified as underweight                                 | 0.009           | -0.153          | -0.021          | -0.085          | -0.044          | 0.008           | 0.064           | <b>-0.305*</b>    | <b>-0.301*</b>  | <b>-0.396**</b> | -0.138 | <b>-0.310*</b> | -0.086         | -0.199          |
| Mean Life satisfaction score of students - family life                          | 0.200           | 0.125           | <b>0.271*</b>   | <b>0.236*</b>   | <b>0.271*</b>   | 0.018           | <b>0.299*</b>   | 0.062             | 0.045           | 0.245           | 0.077  | -0.028         | 0.121          | 0.060           |
| Mean Life satisfaction score of students - friendship                           | 0.066           | -0.035          | 0.098           | 0.231           | 0.202           | -0.013          | <b>0.237*</b>   | -0.068            | 0.192           | 0.231           | 0.073  | 0.035          | 0.115          | -0.051          |
| Mean Life satisfaction score of students - school experience                    | -0.050          | -0.153          | 0.042           | 0.183           | 0.008           | -0.113          | 0.078           | 0.219             | 0.244           | <b>0.384**</b>  | 0.187  | 0.235          | 0.137          | <b>0.292*</b>   |
| Mean Life satisfaction score of students - themselves                           | <b>0.262*</b>   | 0.039           | <b>0.348**</b>  | 0.061           | <b>0.376**</b>  | -0.005          | <b>0.459**</b>  | 0.126             | 0.167           | 0.220           | 0.288* | 0.098          | 0.265          | <b>0.295*</b>   |

| HKSHQ measures                                                | Primary schools |       |       |               |               |        |                | Secondary Schools |       |               |       |       |       |       |
|---------------------------------------------------------------|-----------------|-------|-------|---------------|---------------|--------|----------------|-------------------|-------|---------------|-------|-------|-------|-------|
|                                                               | AC1.1           | AC1.3 | AC2.1 | AC3.2         | AC3.3         | AC3.4  | AC4.3          | AC1.1             | AC1.3 | AC2.1         | AC3.2 | AC3.3 | AC3.4 | AC4.3 |
| Mean Life satisfaction score of students - living environment | 0.218           | 0.042 | 0.225 | <b>0.285*</b> | 0.230         | -0.006 | <b>0.338**</b> | 0.139             | 0.063 | 0.271         | 0.244 | 0.138 | 0.122 | 0.117 |
| Mean Life satisfaction score of students - overall life       | 0.155           | 0.034 | 0.193 | 0.186         | <b>0.259*</b> | -0.046 | <b>0.347**</b> | 0.107             | 0.094 | <b>0.291*</b> | 0.270 | 0.121 | 0.098 | 0.073 |

**(b) Community Links (CL) and Health Related Outcomes**

| HKSHQ measures                                                           | Primary schools |                 |                |        | Secondary schools |                |        |               |
|--------------------------------------------------------------------------|-----------------|-----------------|----------------|--------|-------------------|----------------|--------|---------------|
|                                                                          | CL1.2           | CL2.2           | CL3.2          | CL3.4  | CL1.2             | CL2.2          | CL3.2  | CL3.4         |
| % of students think they are having good health status over past 30 days | 0.110           | <b>0.370**</b>  | <b>0.351**</b> | 0.209  | -0.016            | <b>0.274*</b>  | 0.040  | 0.111         |
| % of students that often obey traffic signals                            | <b>0.270*</b>   | 0.121           | 0.037          | 0.138  | <b>0.261*</b>     | 0.257          | 0.235  | 0.273*        |
| % of students that often put on seatbelts                                | <b>0.270*</b>   | 0.118           | -0.026         | -0.011 | <b>0.284*</b>     | 0.272*         | 0.053  | 0.344**       |
| Mean K6 score of students                                                | -0.058          | <b>-0.375**</b> | -0.057         | -0.278 | -0.119            | <b>-0.293*</b> | -0.046 | -0.397**      |
| Mean Life satisfaction score of students - family life                   | <b>0.268*</b>   | <b>0.328**</b>  | 0.177          | 0.169  | -0.047            | 0.040          | 0.122  | 0.208         |
| Mean Life satisfaction score of students - school experience             | 0.005           | 0.029           | -0.069         | -0.008 | 0.172             | 0.193          | 0.061  | <b>0.340*</b> |
| Mean Life satisfaction score of students - themselves                    | <b>0.235*</b>   | <b>0.305**</b>  | 0.075          | 0.030  | 0.056             | 0.280          | 0.011  | 0.239         |
| Mean Life satisfaction score of students - living environment            | 0.193           | <b>0.255*</b>   | -0.005         | 0.239* | 0.099             | 0.133          | -0.055 | 0.203         |
| Mean Life satisfaction score of students - overall life                  | 0.155           | <b>0.292*</b>   | 0.025          | 0.107  | 0.081             | 0.128          | 0.006  | 0.240         |

***(c) School's Social Environment (SE) and Health Related Outcomes***

| HKSHQ measures                                                                  | Primary schools |                 | Secondary Schools |                |
|---------------------------------------------------------------------------------|-----------------|-----------------|-------------------|----------------|
|                                                                                 | SE2.2           | SE3.2           | SE2.2             | SE3.2          |
| % of students think they are having good academic performance in past 12 months | <b>0.223*</b>   | 0.037           | 0.142             | 0.174          |
| % of students having enough physical activity                                   | <b>0.252*</b>   | 0.190           | -0.056            | 0.006          |
| % of students having K6 score >12                                               | <b>-0.259*</b>  | <b>-0.241*</b>  | -0.157            | <b>-0.300*</b> |
| Mean K6 score of students                                                       | <b>-0.211*</b>  | <b>-0.291**</b> | -0.241            | -0.248         |

***(d) School's Physical Environment (PE) and Health Related Outcomes***

| HKSHQ measures                                                | Primary Schools |        |          |        |                 | Secondary schools |        |         |        |                |
|---------------------------------------------------------------|-----------------|--------|----------|--------|-----------------|-------------------|--------|---------|--------|----------------|
|                                                               | PE1.1           | PE1.4  | PE1.5    | PE1.7  | PE4.1           | PE1.1             | PE1.4  | PE1.5   | PE1.7  | PE4.1          |
| % of students having enough fruit every day                   | 0.119           | -0.208 | 0.217*   | 0.155  | 0.164           | 0.194             | 0.150  | 0.082   | 0.330* | <b>0.345**</b> |
| % of students having soft drink more than 4 times per week    | -0.278**        | 0.161  | -0.194   | -0.142 | <b>-0.282**</b> | -0.046            | 0.067  | -0.026  | 0.024  | 0.082          |
| % of students having enough physical activity                 | <b>0.216*</b>   | -0.061 | 0.302**  | 0.068  | <b>0.239*</b>   | 0.248             | -0.048 | 0.203   | 0.124  | 0.055          |
| Mean K6 score of students                                     | <b>-0.227*</b>  | 0.269* | -0.277** | -0.160 | -0.183          | <b>-0.284*</b>    | 0.119  | -0.295* | -0.173 | -0.302*        |
| Mean Life satisfaction score of students - living environment | <b>0.265*</b>   | 0.026  | 0.106    | 0.110  | 0.220           | <b>0.335*</b>     | 0.041  | 0.401** | 0.066  | 0.072          |
| Mean Life satisfaction score of students - overall life       | <b>0.258*</b>   | -0.056 | 0.181    | 0.093  | 0.183           | 0.196             | -0.019 | 0.351*  | -0.020 | 0.110          |

*(e) School Health Care and Promotion Services (HS) and Health Related Outcomes*

| HKSHQ measures                                                           | Primary Schools |        |               |        | Secondary Schools |        |                |          |
|--------------------------------------------------------------------------|-----------------|--------|---------------|--------|-------------------|--------|----------------|----------|
|                                                                          | HS1.2           | HS2.1  | HS2.3         | HS6.1  | HS1.2             | HS2.1  | HS2.3          | HS6.1    |
| % of students think they are having good health status over past 30 days | -0.014          | 0.092  | <b>0.224*</b> | 0.149  | 0.187             | 0.251  | <b>0.272*</b>  | 0.188    |
| Mean K6 score of students                                                | 0.101           | -0.115 | -0.140        | -0.138 | -0.342            | -0.249 | <b>-0.280*</b> | -0.446** |

*(f) Healthy School Policies (HS) and Health Related Outcomes*

| HKSHQ measures                                                                  | Primary schools |         |                |        | Secondary Schools |                |        |                 |
|---------------------------------------------------------------------------------|-----------------|---------|----------------|--------|-------------------|----------------|--------|-----------------|
|                                                                                 | PO2.1           | PO2.2   | PO2.3          | PO2.4  | PO2.1             | PO2.2          | PO2.3  | PO2.4           |
| % of students that often obey traffic signals                                   | -0.023          | -0.052  | 0.006          | 0.041  | 0.173             | <b>0.260*</b>  | 0.160  | 0.232           |
| % of students that often put on seatbelts                                       | -0.065          | -0.060  | -0.124         | -0.152 | 0.270             | <b>0.259*</b>  | 0.029  | 0.157           |
| % of students feeling so sad or hopeless that he/she will stop usual activities | -0.087          | -0.227* | <b>-0.226*</b> | -0.066 | -0.079            | -0.025         | -0.009 | -0.094          |
| % of students who are classified as underweight                                 | -0.007          | 0.017   | -0.005         | -0.084 | <b>-0.288*</b>    | -0.349**       | -0.247 | <b>-0.509**</b> |
| Mean Life satisfaction score of students - school experience                    | -0.104          | -0.075  | -0.022         | -0.169 | 0.261             | <b>0.388**</b> | 0.049  | 0.055           |
| Mean Life satisfaction score of students - overall life                         | 0.055           | 0.060   | -0.040         | -0.143 | 0.149             | <b>0.296*</b>  | -0.163 | -0.151          |
